# Supplementary material for: Jia-Wei-Kai-Xin-San Treatment Alleviated Mild Cognitive Impairment through Anti-Inflammatory and Antiapoptotic Mechanisms in SAMP8 Mice
Source: Hindawi journal article supplement (doi:10.1155/2023/7807302), 2023-11-02
Supplement: f1 [file 7807302.f1.pdf]

Figure 4

|                               | Repeat1                                                                             | Repeat2                                                                              | Repeat3                                                                               |
|-------------------------------|-------------------------------------------------------------------------------------|--------------------------------------------------------------------------------------|---------------------------------------------------------------------------------------|
| NLRP3                         | 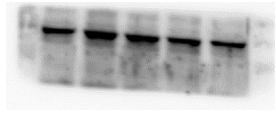   |    |    |
| Casp-1/<br>Cleaved-<br>Casp-1 |    |    |    |
| IL-18                         |    |    |    |
| IL-1 $\beta$                  |    |    |    |
| TLR4                          |   |   |   |
| NF- $\kappa$ B                |  |  |  |
| TNF- $\alpha$                 |  |  |  |
| IL-6                          |  |  |  |
|                               |                                                                                     |                                                                                      |                                                                                       |

Figure 5

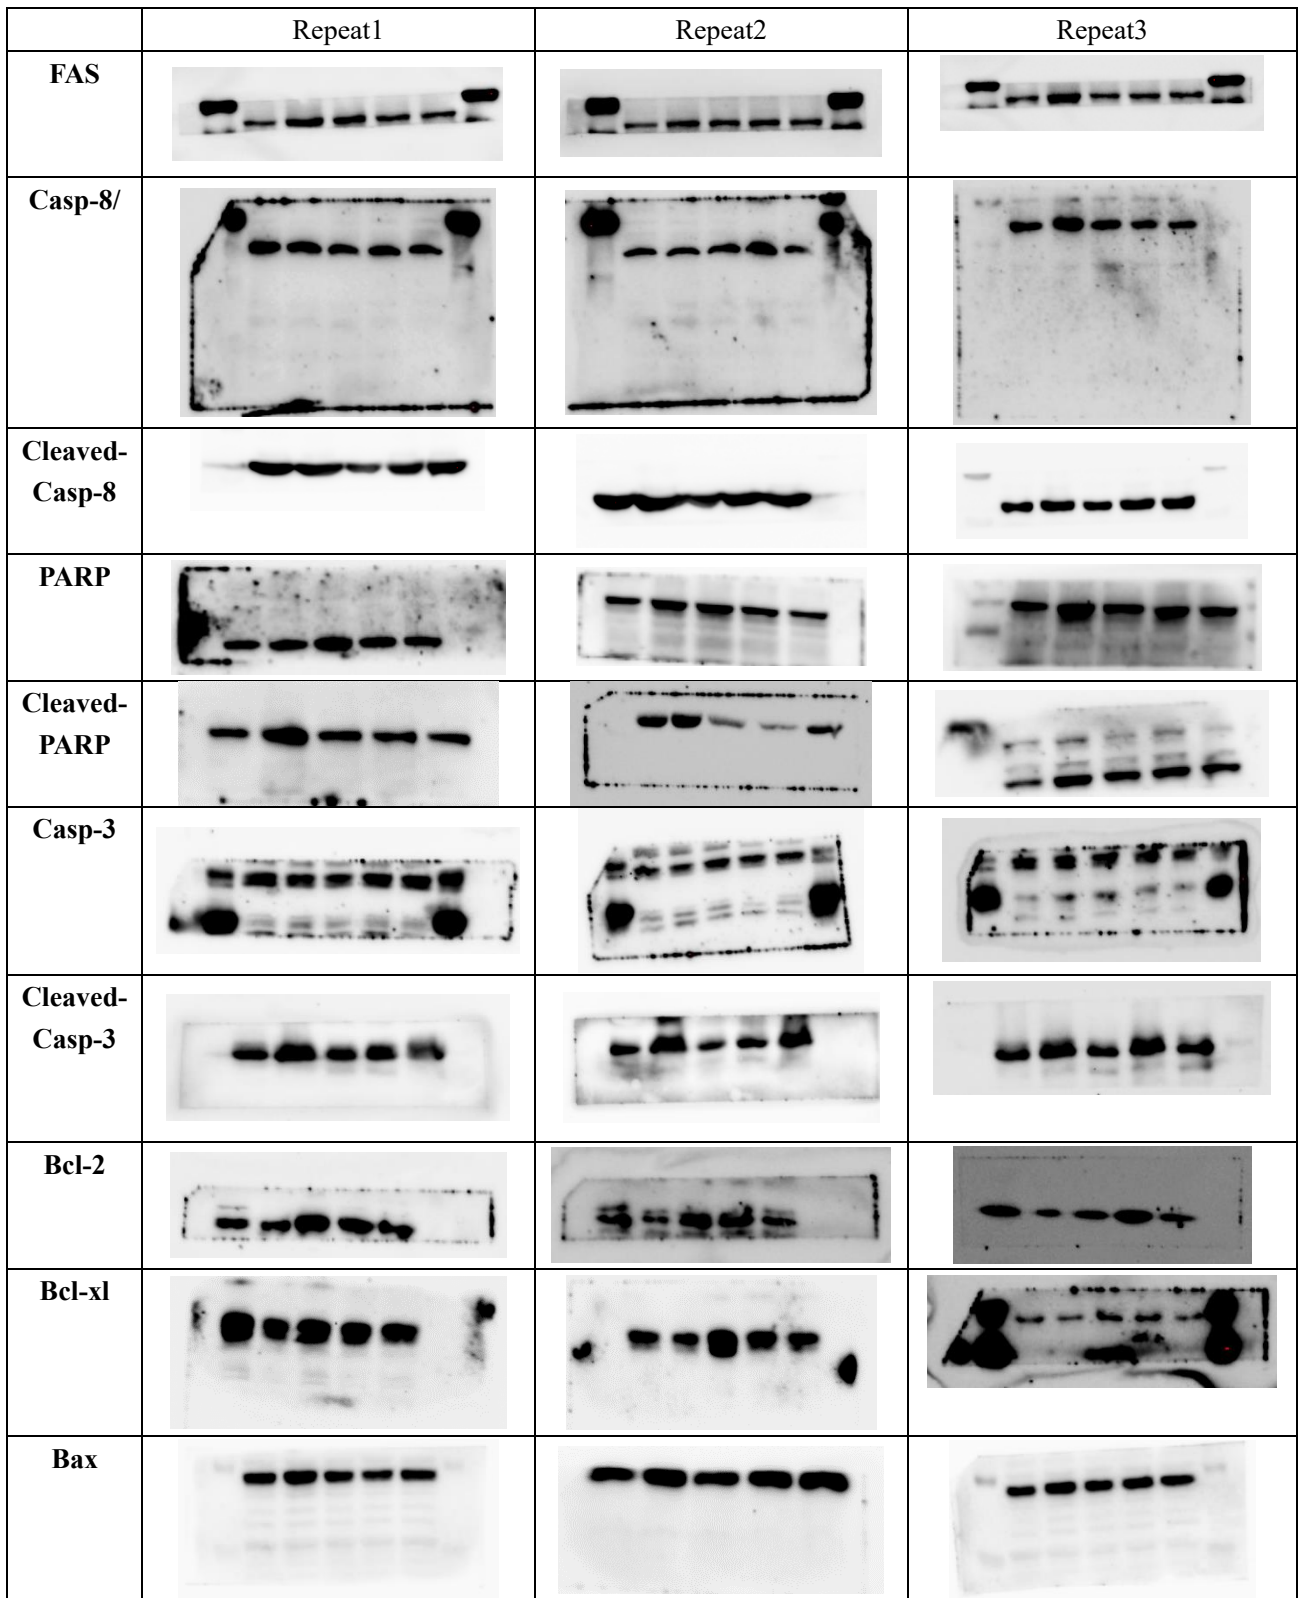

|                                                   |                                                                                   |                                                                                    |                                                                                     |
|---------------------------------------------------|-----------------------------------------------------------------------------------|------------------------------------------------------------------------------------|-------------------------------------------------------------------------------------|
| <b>Casp-9</b><br><b>Cleaved-</b><br><b>Casp-9</b> | 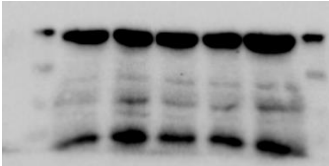 |  |  |
|                                                   |                                                                                   |                                                                                    |                                                                                     |

Figure 6

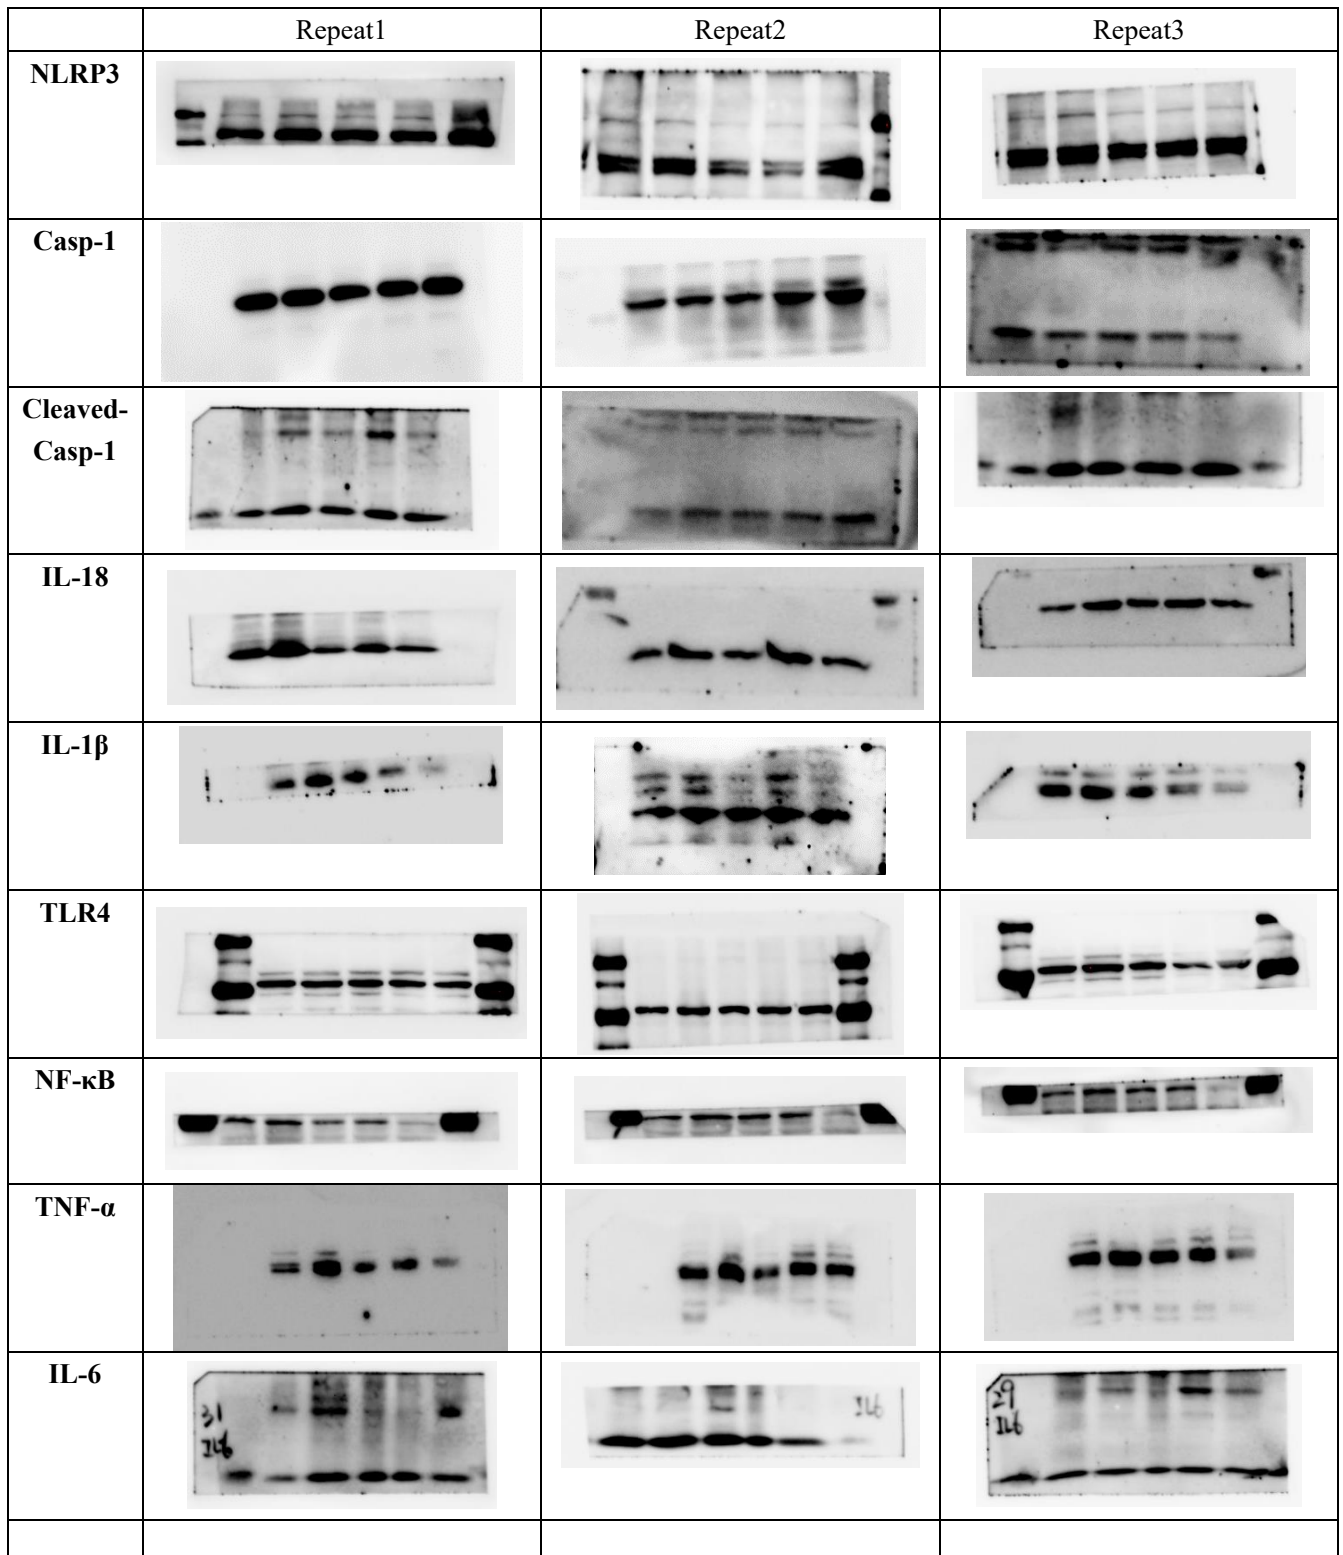

Figure 7

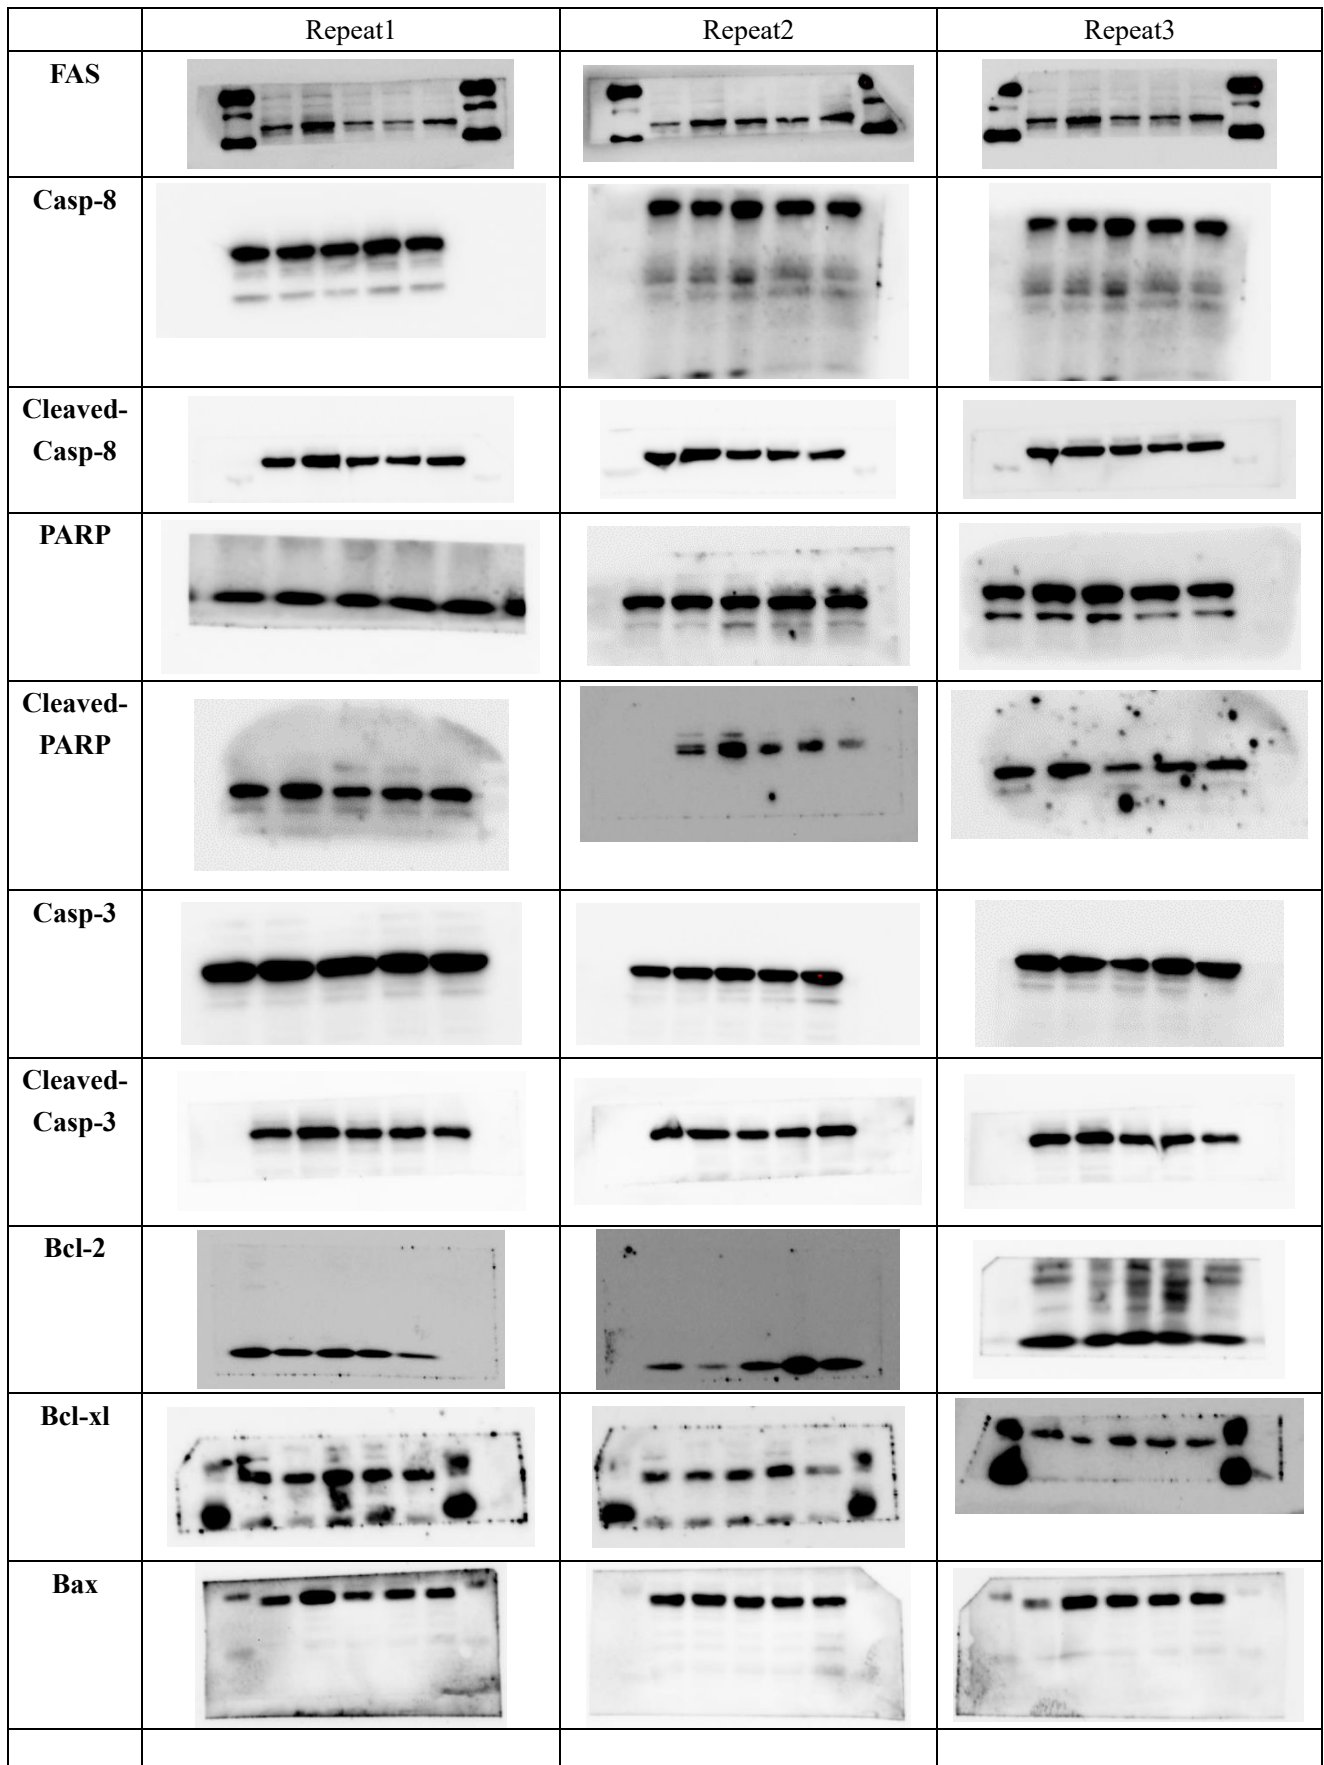

The sampling order of the blots is as follows: Control/Model/JWKXS-H/JWKXS-L/BYHWD. In addition to JWKXS, we actually provide BYHWD (Buyang Huanwu Decoction) to explore its mechanism. Due to some of its poor effects and unrelated to this article, it is not included. Original western blots were repeated three times.
